# Supplementary material for: Three-dimensional superhydrophobic porous hybrid monoliths for effective removal of oil droplets from the surface of water
Source: Royal Society of Chemistry journal article supplement (doi:10.1039/c4ra00047a), 2014-01-01
Supplement: c4ra00047a1.pdf [file c4ra00047a1.pdf]

## Electronic Supplementary Information

### Three-Dimensional Superhydrophobic Porous Hybrid Monoliths for

### Effective Removal of Oil Droplet from the Surface of Water

Caibao Chen, Run Li, Liming Xu and Deyue Yan\*

*School of Chemistry and Chemical Engineering, State Key Laboratory of Metal Matrix*

*Composites, Shanghai Jiao Tong University, 800 Dongchuan Road, Shanghai 200240, P.R. China*

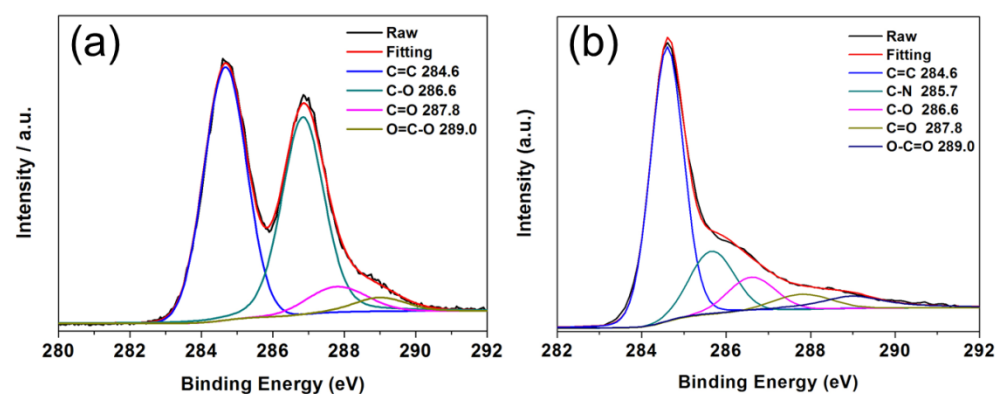

**Fig.S1.** The curve fit of C1s spectra of (a) GO and (b) rGO.

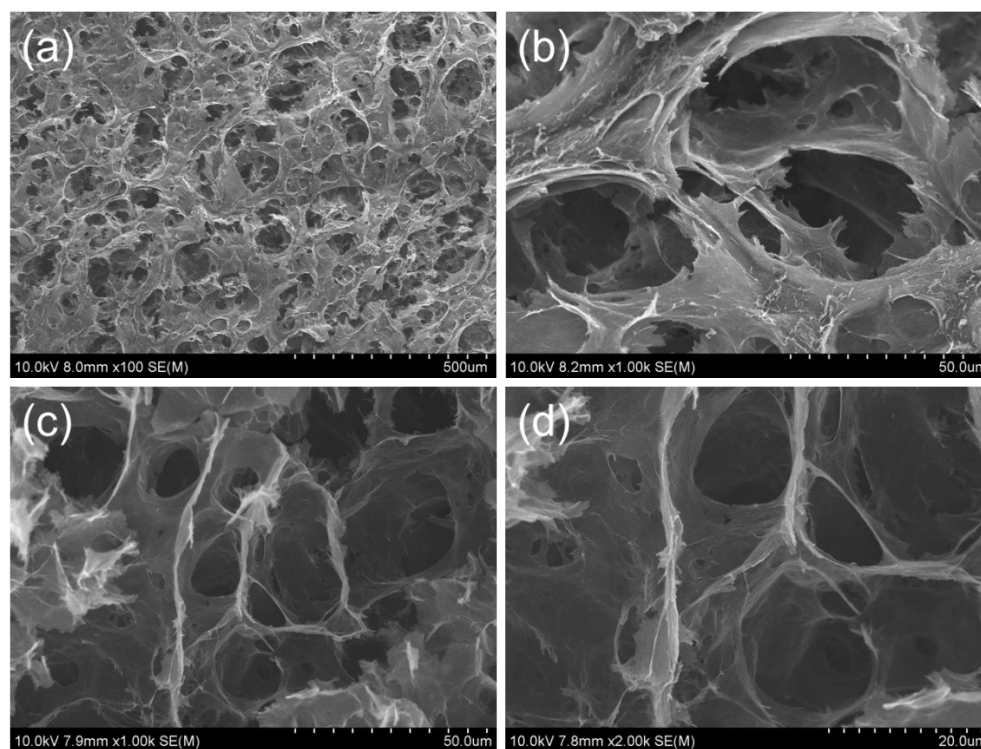

**Fig. S2.** SEM images of net 3D rGO aerogel surface(a, b) and (c, d) cross-sectional morphology at different magnifications.

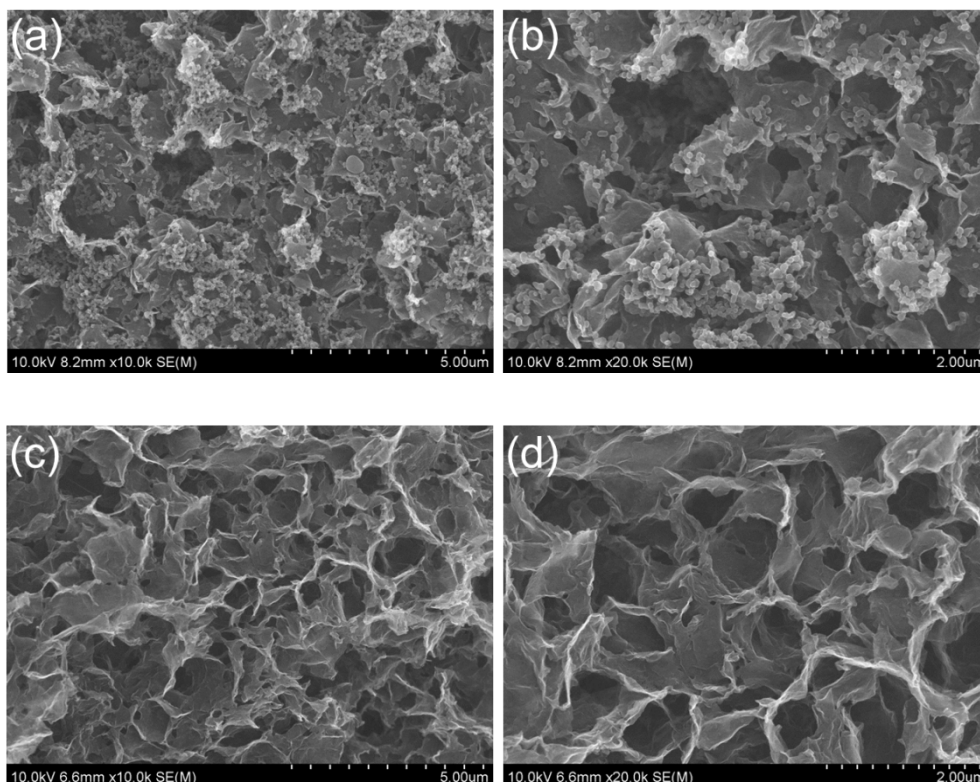

**Fig. S3.** SEM images of rGO/PS monoliths surface (a, b) and (c, d) cross-sectional morphology at different magnifications.

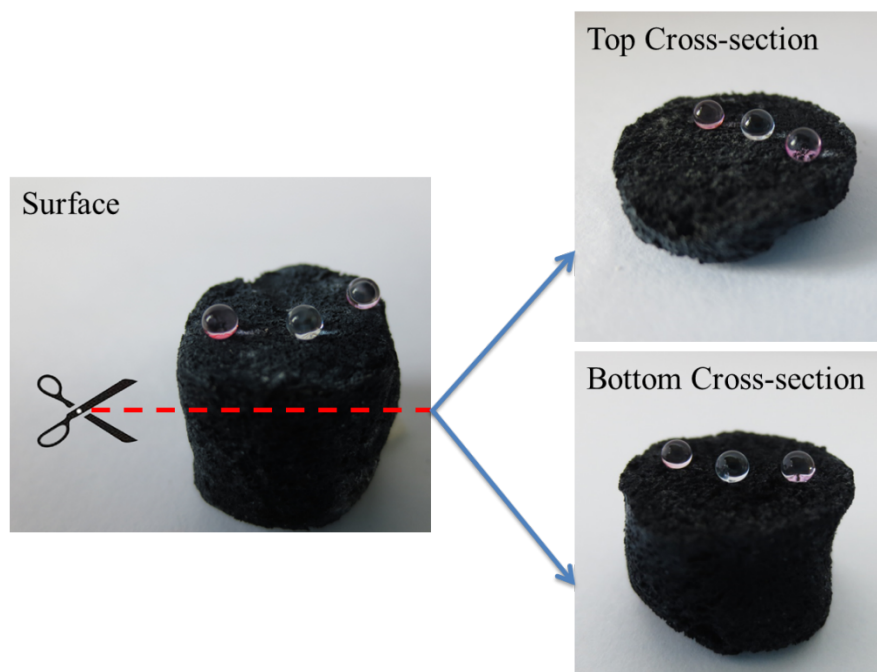

**Fig. S4.** Optical image of aqueous hydrochloric acid (left, pH = 1), NaCl (middle, pH = 7), and NaOH (right, pH = 14) solution droplets with spherical shapes on the surface (left) and cross-section (upper right and lower right) of the monoliths, verifying stable superhydrophobicity towards different corrosive solutions.

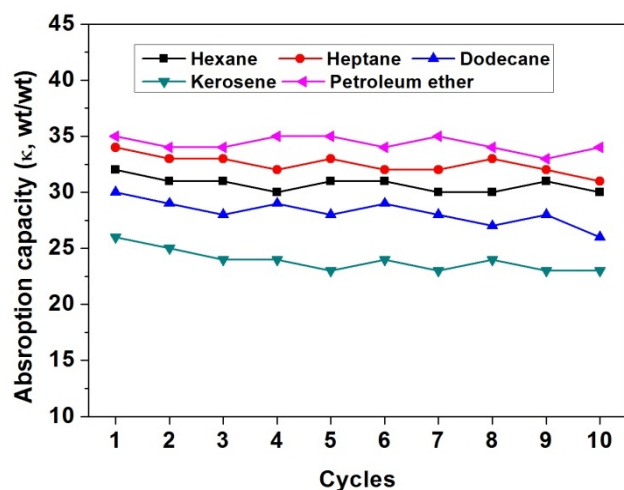

Fig. S5. Absorption recyclability of the monoliths for oil and organic solvents.

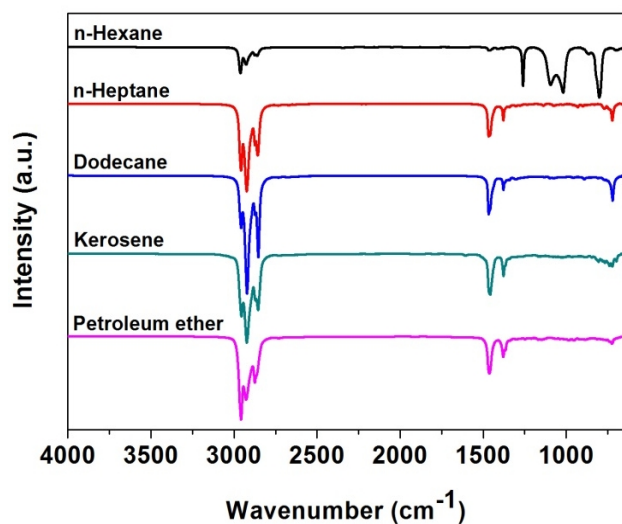

Fig. S6. ATR-FTIR spectra of the oil and organic solvents collected from the monoliths after the tenth oil-water separation cycles.

**Table S1.** Comparison of the absorption capacities of various absorbing materials

| Materials                      | Adsorption capacity for different oils (g g <sup>-1</sup> ) | Reference |
|--------------------------------|-------------------------------------------------------------|-----------|
| Corn stalk                     | 8                                                           | 1         |
| Cotton fiber                   | 20                                                          | 2         |
| Pith bagasse                   | 25                                                          | 3         |
| Exfoliated graphite            | 14.4                                                        | 4         |
| Zeolite                        | 0.17–0.19                                                   | 5         |
| Organo-clays                   | 2.1–7.2                                                     | 6         |
| Expanded perlite               | 3.2–7.5                                                     | 7         |
| Natural wool fibers            | 33–43                                                       | 5         |
| Polypropylene                  | 9.9–15.7                                                    | 8         |
| Butyl rubber                   | 7.9–23                                                      | 8         |
| Spongy graphene                | 20–86                                                       | 9         |
| Graphene-CNT hybrid foam       | 80–130                                                      | 10        |
| Macroporous rGO film           | 8–45                                                        | 11        |
| Graphene/Polypyrrole foam      | 37–108                                                      | 12        |
| Carbon nanofibre aerogel       | 40–115                                                      | 13        |
| Conjugated microporous polymer | 6–23                                                        | 14        |
| Modified polyurethane sponge   | 15–25                                                       | 15        |
| Present work                   | 32–50                                                       | –         |

## References

- 1 M. Husseien, A. A. Amer, A. El-Maghraby and N. Hamedallah, *J. Anal. Appl. Pyrolysis*, 2009, **86**, 360.
- 2 G. Deschamps, H. Caruel, M. Borredon, C. Bonnin and C. Vignoles, *Environ. Sci. Technol.*, 2003, **37**, 1013.
- 3 M. Husseien, A. A. Amer and I. I. Sawsan, *J. Anal. Appl. Pyrolysis*, 2008, **82**, 205.
- 4 B. Tryba, A. W. Morawski, R. J. Kaleńczuk and M. Inagaki, *Spill Sci. Technol. Bull.*, 2003, **8**, 569.
- 5 V. Rajaković-Ognjanović, G. Aleksić and L. Rahaković, *J. Hazard. Mater.*, 2008, **154**, 558.
- 6 O. Carmody, R. Frost, Y. F. Xi and S. Kokot, *J. Colloid Interface Sci.*, 2007, **305**, 17.
- 7 D. Bastani, A. A. Safekordi, A. Alihosseini and V. Taghikhani, *Sep. Purif. Technol.*, 2006, **52**, 295.
- 8 D. Ceylan, S. Doyu, B. Karacik, S. D. Yakan, O. S. Okay and O. Okay, *Environ. Sci. Technol.*, 2009, **43**, 3846.
- 9 H. C. Bi, X. Xie, K. B. Yin, Y. L. Zhou, S. Wan, L. B. He, F. Xu, F. Banhart, L. Sun and R. S. Rouff, *Adv. Funct. Mater.* 2012, **22**, 4421.
- 10 X. Dong, J. Chen, Y. Ma, J. Wang, M. B. Chan-Park, X. Liu, L. Wang, W. Huang and P. Chen, *Chem. Commun.*, 2012, **48**, 10660.
- 11 S. J. Yang, J. H. Kang, H. Jung, T. Kim and C. R. Park, *J. Mater. Chem. A*, 2013,

- 1, 9427.
- 12 H. Li, L. Liu and F. Yang, *J. Mater. Chem. A*, 2013, **1**, 3446.
  - 13 H.-W. Liang, Q.-F. Guan, L.-F. Chen, Z. Zhu, W.-J. Zhang and S.-H. Yu, *Angew. Chem., Int. Ed.*, 2012, **51**, 5101.
  - 14 A. Li, H.-X. Sun, D.-Z. Tan, W.-J. Fan, S.-H. Wen, X.-J. Qing, G.-X. Li, S.-Y. Li and W.-Q. Deng, *Energy Environ. Sci.*, 2011, **4**, 2062.
  - 15 Q. Zhu, Y. Chu, Z. Wang, N. Chen, L. Lin, F. Liu and Q. Pan, *J. Mater. Chem. A*, 2013, **1**, 5386.
